# Supplementary material
Source: Elsevier journal article supplement (https://www.sciencedirect.com/science/article/pii/S0212656714001814)

01.Rural / 02. Urbano / 03. Orl / 04. Residencia Código centro
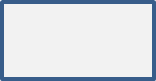
 Nº pcte
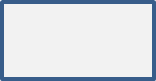


A) ESTADO CIVIL: CASADO, SOLTERO, VIUDO, SEPARADO-DIVORCIADO, NOVIOS, PAREJA DE HECHO

B) NIVEL DE ESTUDIOS: ANALFABETO, LEE Y ESCRIBE, ESTUDIOS PRIMARIOS, MEDIOS, UNIVERSITARIOS

DECISIÓN MÉDICA CONSENTIMIENTO **NO ESCRITO** **ESCRITO** ¿ INGRESO ORL? SI NO

MEDIR EL TIEMPO: HORA DE INICIO DEL TEST HORA MINUTO
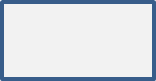


1. Capacidad para **entender el problema médico**: SI NO DUDOSO

¿Qué problemas está teniendo en este momento? ¿Por qué motivo está en el hospital?

1. Capacidad para **entender el tratamiento** propuesto: SI NO DUDOSO

¿Cuál es el tratamiento para su problema? , ¿Qué más podemos hacer para ayudarle?

1. Capacidad para entender **alternativas al tratamiento** propuesto (si las hay): SI NO DUD

¿Existen otros tratamientos? , ¿Cuáles son las otras opciones que tiene? , ¿Se le pueden aplicar?

1. Capacidad para entender la opción a **rechazar el tratamiento** propuesto

( incluyendo su retraso o el abandono del mismo): SI NO DUDOSO

¿Puede rechazar el tratamiento propuesto? , ¿Podemos parar el tratamiento propuesto?

1. Capacidad para **apreciar las consecuencias**, razonables y previsibles,

**de aceptar el tratamiento** propuesto: SI NO DUDOSO

¿Qué podría pasarle si se le aplica el tratamiento propuesto? ,¿Puede causar el tratamiento propuesto problemas o efectos secundarios? , ¿Puede ayudarle el tratamiento propuesto a vivir más?

1. Capacidad para **apreciar las consecuencias**, razonables y previsibles,

**de rechazar el tratamiento** propuesto (incluyendo su retraso o el abandono del mismo):

¿Qué podría pasarle si no recibe el tratamiento propuesto? , SI NO DUDOSO

¿Podría ponerse peor/fallecer si no recibe el tratamiento propuesto? ,

¿Qué podría pasar si se le aplica un tratamiento alternativo? (Si hay tratamientos alternativos disponibles)

7a. La decisión de la persona se ve afectada por una **depresión**: SI NO DUDOSO

¿Tiene esperanza en el futuro? ¿Merece que se le aplique un tratamiento?, ¿Se siente castigado?

7b. La decisión de la persona se ve afectada por **delirios/psicosis**: SI NO DUDOSO

¿Cree que alguien está intentando hacerle daño? , ¿Confía en su médico/enfermera?

Impresión general**: Capaz sin duda [ ] Probablemente capaz [ ] Probablemente incapaz [ ] Incapaz sin duda [ ]**

**HORA DE FINALIZACIÓN DEL TEST ACE** HORA
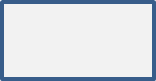
 MINUTO
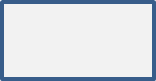


**¿TOMA USTED ALCOHOL?**

1. NO
2. SI ……………… TEST DE CAGE:

¿Le ha molestado alguna vez la gente criticándole su forma de beber? SI NO

¿Ha tenido alguna vez la impresión de que debería beber menos? SI NO

¿Se ha sentido alguna vez mal o culpable por su costumbre de beber? SI NO

¿Alguna vez lo primero que ha hecho por la mañana ha sido beber para

calmar sus nervios o para liberarse de una resaca? SI NO

**DEPRESION: si o no**

**Menores de 65 años Mayores de 65 años**

¿Se ha sentido con poca energía? ¿Siente que su vida está vacía?

¿Ha perdido Vd. el interés por las cosas? ¿Se siente con frecuencia aburrido?

¿Ha perdido la confianza en sí mismo? ¿Se encuentra de buen humor la mayor parte tiempo?

¿Se ha sentido desesperanzado, sin esperanzas? ¿Con frecuencia se siente desamparado desprotegido?

¿ Se siente lleno/a de energía?

**MINIMENTAL TEST MEC**

**Dígame el día fecha
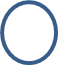
 Mes
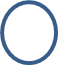
 Estación
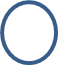
 Año
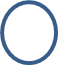
**

**Dígame el lugar donde estamos
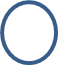
 Planta
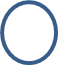
 Ciudad
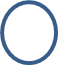
 Provincia
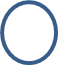
 Nación
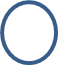
**

**Repita estas tres palabras; peseta, caballo, manzana (hasta que se las aprenda)**

**Si tiene 30 ptas. y me va dando de tres en tres ¿cuántas le van quedando?**

27
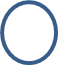
 24
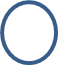
 21
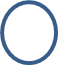
 18
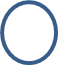
 15
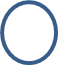


**Repita estos tres números: 5, 9, 2 (hasta que los aprenda)Ahora hacia atrás
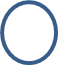

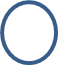

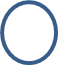
**

**¿Recuerda las tres palabras de antes?
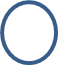

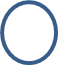

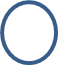
**

**Mostrar un bolígrafo. ¿Qué es esto?
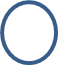
 , repetirlo con un reloj
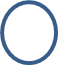
**

**Repita esta frase: En un trigal había cinco perros
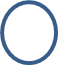
**

**Una manzana y una pera, son frutas ¿verdad? ¿qué son el rojo y el verde ?
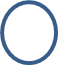
**

**¿Y un perro y un gato?
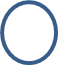
**

**Coja este papel con la mano derecha dóblelo y póngalo encima de la mesa
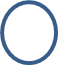
**

**SI SABER LEER Y ESCRIBIR 1. Lea esto y haga lo que dice: CIERRE LOS OJOS
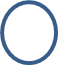
**

**CIERRE LOS OJOS**

CIEcRRE LOS OJOS

SS

**2. Escriba una frase**
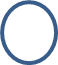


**3. COPIE EL DIBUJO
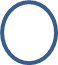
**

HOJA RESUMEN DEL INVESTIGADOR CASO Nº
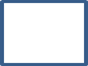


AN/ DNI________________________ 1. Hombre 2. Mujer EDAD _________ años

PROCESOS: ADS, CARDIOPATIA ISQUEMICA, EPOC, PROSTATA, DIABETES, HTA, DEMENCIA, PLURIPATOLOGICO,

**HIPOACUSIA**: sí o no.

**Otras patologías** relevantes para su salud:

MEDICACIÓN CRÓNICA RELACIONADA CON EL SISTEMA NERVIOSO CONSUMIDA POR EL PACIENTE:

N02A – OPIOIDES: MORFICOS, FENTANILO, TRAMADOL, CODEINA, TRASTEC, IBUPROFENO CON CODEINA.

N02B – ANALGESICOS: PARACETAMOL +- CODEINA, DOLALGIAL, METAMIZOL, HEMICRANEAL, TRIPTAN.

N03- ANTIEPILEPTICOS: BARBIT, FENITOINA, RIVOTRIL, CARBAMAZ, TRILEPTAL, VALPR, GABAPE, LYRI,TOPMX

N04A- ANTIPARKINSON ANTICOLINERGICOS: AKINETON, ARTANE.

N04B- ANTIPARKINSON DOPAMINERGICOS: SINEMET, STALEVO, PRAMIPEXOL, ROPIRINOL, SELEGIN, CAPONA

N05A- PSICOLEPTICOS: PROMAZINA, HALOPERIDOL, ZIPRASIDONA, ZUCLOPENTIXOL, CLOZAPINA, OLANZAP, QUETIAPINA, SULPIRIDA, TIAPRIDA, LITIO, ARIPIPRAZOL, PALIPERIDONA, RISPERIDONA.

N05B - ANSIOLÍTICOS: ALPRAZOLAM, CLORAZEPATO POT, DIAZEP, KETAZOL, LORAZEPAN, HIDROXIZ (ATARX)

N05C – HIPNÓTICOS SEDANTES: FLUNITR (ROHIPN), FLURAZ (DORMD),LORMETAZ,MIDAZO,ZOLP,ZOPI,CLOMTZ

N06A- ANTIDEPRESIVOS: AMITRIPT, CLOMIPR, IMIPRAM, MAPROT, CITALOP, ES, FLUOX, FLUVOX, AGOMELATINA (VALDOXAN), BUPROPION, DULOXETIN, MIRTAZ, REBOX, TRAZODONA, VENLAFAX.

N06B- PSICOESTIMULANTES: CAFEINA, CITICOLINA, HIPÉRICO, PIRACETAM, DENUBIL.

N06C- ASOCIACIONES PSICOLEPT/ESTIM: NOBRITOL, MUTABASE, TROPARGAL, DEANXIT.

N06D- ANTI- DEMENCIA: DONEZEPILO, GALANT- MEMANT, RIVASTIGMINA, GINKGO BILOBA (TANAKENE).

N07A- PARASIMPATICOMIMÉTICOS: MESTINON. N07B- COLME, NALTREXONA.

N07C- VERTIGO: BETAHISTINA, FLUNARIZINA.

MEDICAMENTOS (no incluir cremas): **SIST NERVIOSO**
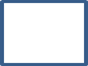
  **RESTO**

DECISIÓN MÉDICA QUE PRECISA CONSENTIMIENTO INFORMADO **NO ESCRITO** **ESCRITO**

CÓDIGO


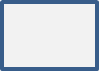


**ALCOHOL:** SI - NO **CAGE** (0-4):  **MEC**
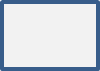


**DEPRESIÓN :** SI - NO GOLDBERG SI ( ≥ 2 ) NO ( 0-1)
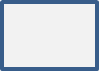


YESAVAGE : SI ( ≥ 2 ERRORES) ____ Correcto: SI: 1,2,4. NO: 3,5.
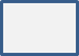

Supplement: mmc1 [file S0212656714001814:mmc1.docx]
