# Supplementary material
Source: Elsevier journal article supplement (https://www.sciencedirect.com/science/article/pii/S0212656714001814)
Supplement: mmc2 [file S0212656714001814:mmc2.docx]

**Anexo 2.- Ayuda para la evaluación de la capacidad (ACE)**

La capacidad es la habilidad de entender información que es relevante para una decisión y la habilidad de apreciar las consecuencias que pueden preverse de forma razonable derivadas de una decisión (o de la ausencia de la misma). La finalidad de la Ayuda para la evaluación de la capacidad (ACE, según sus iniciales en inglés) es ayudar a los clínicos a evaluar de forma sistemática la capacidad de un paciente ante una decisión médica.

Los desarrolladores de la ACE (i) no asumen responsabilidad alguna derivada de la confianza que deposite ningún usuario en la información contenida en el presente documento; (ii) no realizan ninguna manifestación relativa a la calidad, precisión o legalidad relativas al uso de la ACE y (iii) recomiendan la asistencia de los usuarios de la ACE a una sesión de formación ACE estandarizada.

La ACE se desarrolló con el apoyo de los médicos de Ontario a través de una beca de la fundación Physicians' Services Incorporated.

Se permite la copia de la ACE por cualquier persona para un uso no comercial de la misma.

*Si tiene alguna pregunta relativa a la ACE, póngase en contacto con:*

Dr. E. Etchells

Sunnybrook & Women’s College Health Sciences Centre (Centro de Ciencias Sanitarias Sunnybrook y Hospital Universitario de Mujeres) Campus Sunnybrook Habitación C4-10, 2075 Bayview Avenue Toronto, Ontario, M4N 3M5 (Canadá)

Teléfono: (416) 480-6100 x5996, Fax: (416) 480-5951

Correo electrónico: edward.etchells@sw.ca

**Ayuda para la evaluación de la capacidad (ACE)**

**INSTRUCCIONES PARA LA ADMINISTRACIÓN**

1. La capacidad es la habilidad para entender información que es relevante para una decisión y la habilidad de apreciar las consecuencias que pueden preverse de forma razonable derivadas de una decisión (o de la ausencia de la misma).

2. El fin de la ACE es ayudar a los clínicos de forma sistemática a evaluar la capacidad de un paciente al enfrentarse a una decisión médica.

3. Antes de evaluar la capacidad, identifique y trate cualquier barrera a la comunicación (por ejemplo, una deficiencia auditiva, deficiencia visual, barrera de idioma, disfasia, disartria). Otras personas pueden ayudar a otra persona a comunicarse (por ejemplo, realizando una traducción). Estas personas deberían intentar no responder ninguna pregunta por la persona que se está evaluando.

4. Durante la evaluación de la capacidad, el asesor debe proporcionar la información relativa a la decisión (prueba diagnóstica, tratamiento, alternativas, riesgos y efectos secundarios del mismo y acerca de las consecuencias de no recibir el tratamiento) que una persona razonable necesitaría en las mismas circunstancias para tomar una decisión. Responder a cualquier pregunta o solicitud de información adicional.

5. El proceso de información debe continuar durante el proceso completo de la evaluación de la capacidad. Por ejemplo, si la persona no aprecia que es posible que pueda volver a caminar tras una amputación por debajo de la rodilla, vuelva a repetir la información y reevalúe la apreciación.

6. Use las propias palabras del paciente siempre que sea posible (si el paciente llama a un cáncer un “bulto”, utilice el término “bulto” al hablarle).

7. No evalúe si está de acuerdo o no con la decisión de una persona, evalúe la capacidad de dicha persona para entender y apreciar su decisión.

**INSTRUCCIONES PARA LA VALORACIÓN**

1. Los apartados **1-4** evalúan si la persona entiende su problema médico actual, el tratamiento propuesto y otras opciones (incluyendo el retraso o abandono del tratamiento). Los grupos **5-6** evalúan si la persona es consciente de las consecuencias de su decisión.

2. Para los apartados **1-6**, si la persona responde apropiadamente a las preguntas abiertas, marque SÍ. Si es necesario insistir con preguntas cerradas, marque DUDOSO. Si pese a insistir varias veces, no responden apropiadamente, marque NO.

3. Para el apartado **7**, si la persona parece padecer de depresión o psicosis, es necesario decidir si su decisión está afectada por la depresión o la psicosis.

4. Recuerde que se presupone que la gente es capaz, por lo que para su impresión general, si no está seguro, es mejor que se decante por considerar a la persona capaz.

**Ayuda para evaluar la capacidad (ACE) – Formulario**

| Nombre:  Decisión  Tiempo que se ha tardado en administrar la ACE: ______ minutos  Fecha: Día: ____ Mes: __________ Año:______ Hora:__________ Evaluador: | | |
| --- | --- | --- |
| CRITERIOS | Preguntas acerca de | Puntuación |
| EVALUAN LA CAPACIDAD DE ENTENDIMIENTO | 1. Comprender el problema médico | Si- dudoso- no |
| 2. Comprender el tratamiento propuesto | Si- dudoso- no |
| 3. Comprender alternativas al tratamiento propuesto | Si- dudoso- no |
| 4. Comprender la opción de rechazar el tratamiento | Si- dudoso- no |
| EXPLORAN EL RAZONAMIENTO | 5. Las consecuencias de aceptar el tratamiento | Si- dudoso- no |
| 6. Las consecuencias de rechazar el tratamiento | Si- dudoso- no |
| PATOLOGÍA MENTAL QUE PUEDA AFECTAR LA CAPACIDAD | Detectar un contexto de depresión | Si- dudoso- no |
| Detectar un estado de psicosis o delirio | Si- dudoso- no |
| **RESULTADO** | CAPAZ 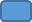 PROBABLEMENTA CAPAZ 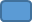 PROBABLEMENTE INCAPAZ 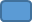 INCAPAZ 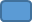 | |

**Comentarios:**

**Por ejemplo, necesidad de evaluación psiquiátrica, mayor información y charla con el paciente o consulta con la familia** ______________________________________________________________________________________________________________________________________________________________________________________________________

La evaluación ACE inicial es el primer paso del proceso de evaluación de la capacidad. Si el resultado del ACE es incapaz sin duda o probablemente incapaz, considere causas tratables o reversibles de incapacidad (como por ejemplo, adicciones a drogas). Repita la evaluación de la capacidad tras tratar estos factores. Si el resultado del ACE es probablemente incapaz o probablemente capaz, emprenda más acciones para aclarar la situación. Por ejemplo, si no está seguro acerca de la habilidad de la persona para entender el tratamiento propuesto, una nueva entrevista que se centre específicamente en esta área sería de utilidad. De forma similar, una consulta con la familia, con una figura cultural o religiosa y/o con un psiquiatra podría aclarar ciertas áreas de incertidumbre.

Nunca base un hallazgo de incapacidad únicamente en su interpretación de las preguntas 7a y 7b.

Incluso si está seguro de que la decisión se basa en un delirio o depresión, le sugerimos que siempre obtenga una evaluación independiente.

Ejemplos de preguntas abiertas:

1. Capacidad para **entender el problema médico**:

¿Qué problema está teniendo en este momento?

¿Por qué motivo está en el hospital?

2. Capacidad para **entender el tratamiento** propuesto

¿Cuál es el tratamiento para su problema?

¿Qué más podemos hacer para ayudarle?

3. Capacidad para entender **alternativas al tratamiento** propuesto (si las hay):

¿Existen otros tratamientos?

¿Cuáles son las otras opciones que tiene?

¿Se le pueden aplicar?

4. Capacidad para entender la opción a **rechazar el tratamiento** propuesto (incluyendo su retraso o el abandono del mismo:

¿Puede rechazar el tratamiento propuesto?

¿Podemos parar el tratamiento propuesto?

5. Capacidad para **apreciar las consecuencias**, razonables y previsibles, **de aceptar el tratamiento** propuesto:

¿Qué podría pasarle si se le aplica el tratamiento propuesto?

¿Puede causar el tratamiento propuesto problemas o efectos secundarios?

¿Puede ayudarle el tratamiento propuesto a vivir más?

6. Capacidad para **apreciar las consecuencias**, razonables y previsibles, **de rechazar el tratamiento** propuesto (incluyendo su retraso o el abandono del mismo):

¿Qué podría pasarle si no recibe el tratamiento propuesto?

¿Podría ponerse peor/fallecer si no recibe el tratamiento propuesto?

¿Qué podría pasar si se le aplica un tratamiento alternativo?

(Si hay tratamientos alternativos disponibles)
